# Supplementary material for: Zirconium Complexes Bearing Methyl/tButyl Salicylate and Their Catalytic Activity on ε-Caprolactone
Source: Preprints.org preprint supplement (doi:10.20944/preprints202407.1184.v1), 2024-07-15
Supplement: Supplementary file 1 [file supplementary]

**Supplementary Materials**

**Methyl/tbutyl salicylate bearing zirconium compounds and their catalytic activity on ε-caprolactone**

Gamze Uzun and Asgar Kayan*

Kocaeli University, Department of Chemistry, Kocaeli, 41380, Turkey


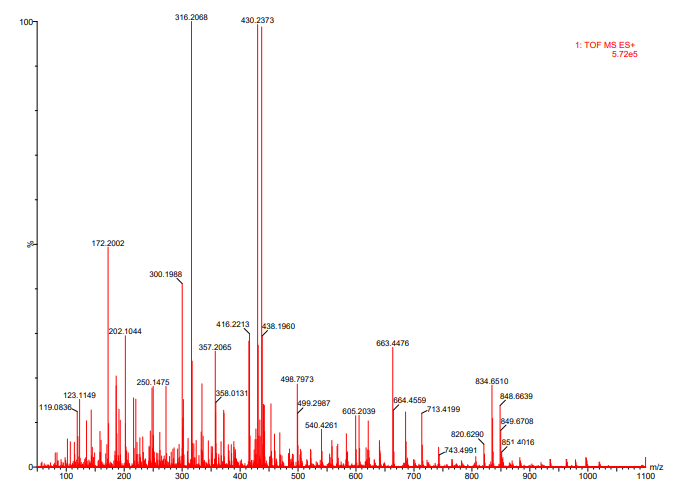


Figure S1. MS spectrum of **C7**


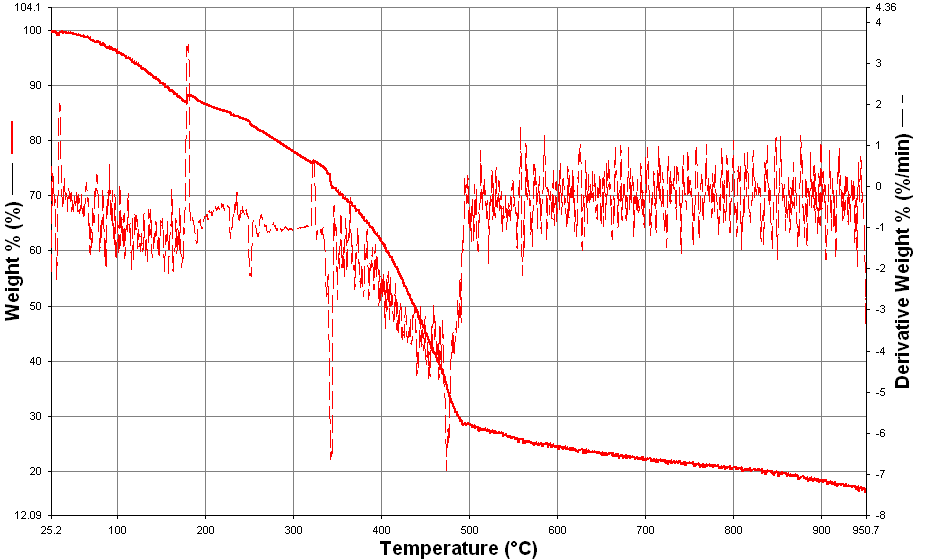


**%mass loss= 83.366%**

Figure S2. TGA spectrum of **C8**
